# Supplementary material for: Isoform Sequencing Provides Insight Into Freezing Response of Common Wheat (Triticum aestivum L.)
Source: Front Genet. 2020 Jun 11;11:462. doi: 10.3389/fgene.2020.00462 (PMC7300213; doi:10.3389/fgene.2020.00462)
Supplement: Supplementary file 6 [file Table_4.XLSX]

## Sheet: Sheet1
Supplementary Table 4 . DEGs identified from ICE-CBF-COR pathway.
Type	Gene name	Gene ID	Chromosome	Start Site	End Site	Length	Expression change
TaCBFs	TaCBF2d	TraesCS2D02G397000	2D	508063150	508064078	929	Down
	TaCBF3a	TraesCS4A02G433200	4A	703931982	703933123	1142	Up
	TaCBF4b	TraesCS5B02G311500	5B	493159433	493159852	420	Down
	TaCBF4d	TraesCS5D02G317700	5D	410842386	410843365	980	Down
	TaCBF6a	TraesCS5A02G311300	5A	523015457	523016095	639	Up
	TaCBF6b	TraesCS5B02G312000	5B	493630369	493631231	863	Up
	TaCBF6d	TraesCS5D02G318300	5D	411170222	411171113	892	Up
	TaCBF8a	TraesCS5A02G310700	5A	522425187	522426058	872	Down
	TaCBF9a	TraesCS5A02G310500	5A	522223637	522224855	1219	Up
	TaCBF10a	TraesCS5A02G310100	5A	522082741	522083550	810	Up
	TaCBF12a	TraesCS5A02G311900	5A	523608682	523609634	953	Up
	TaCBF12d	TraesCS5D02G318800	5D	411789797	411790773	977	Up
	TaCBF13a	TraesCS5A02G311800	5A	523587327	523588067	741	Up
	TaCBF13b	TraesCS5B02G312700	5B	494032899	494033794	896	Up
	TaCBF14a	TraesCS5A02G312000	5A	523615616	523616562	947	Down
	TaCBF14d	TraesCS5D02G318900	5D	411845139	411846097	959	Down
	TaCBF15a	TraesCS5A02G311600	5A	523147896	523148920	1025	Up
	TaCBF15b	TraesCS5B02G312200	5B	493694642	493695611	970	Up
	TaCBF15d	TraesCS5D02G318500	5D	411225112	411225843	732	Up
	TaCBF16b	TraesCS5B02G312100	5B	493673951	493674960	1010	Up
	TaCBF16d	TraesCS5D02G318400	5D	411196748	411197467	720	Up
	TaCBF17d.2	TraesCS5D02G318100	5D	410952213	410953177	965	Up
	TaCBF18a	TraesCS7A02G057700	7A	27901271	27902307	1037	Up
	TaCBF18d	TraesCS7D02G052400	7D	27453025	27454128	1104	Up
TaICE	TaICE1d	TraesCS3D02G434900	3D	547428287	547431483	1538	Up
TaCORs	TaCOR1b	TraesCS4B02G332800	4B	623226593	623227518	793	Up
	TaCOR1d	TraesCS4D02G329500	4D	487654490	487655480	850	Up
	TaCOR2a	TraesCS5A02G503900	5A	669584344	669585225	753	Up
	TaCOR3b	TraesCS5A02G503900	5A	669584344	669585225	753	Up
	TaCOR3d	TraesCS4D02G329400	4D	487652496	487653546	944	Up
	TaCOR4a	TraesCS5A02G503800	5A	669582358	669583277	794	Up
