# Supplementary material for: Isoform Sequencing Provides Insight Into Freezing Response of Common Wheat (Triticum aestivum L.)
Source: Front Genet. 2020 Jun 11;11:462. doi: 10.3389/fgene.2020.00462 (PMC7300213; doi:10.3389/fgene.2020.00462)
Supplement: Supplementary file 7 [file Table_5.XLSX]

## Sheet: ABA signal pathway
Supplementary Table 5. DEGs involved in PYL/PP2C/SnRK2 pathway under freezing stress
Gene name		Gene ID	Chromosome	Start Site	End Site	Length	Expresssion Change
PYLs	TaPYL1-1AS	TraesCS1A02G126800	1A	153337577	153339354	673	Down
	TaPYL1-1DS	TraesCS1D02G126900	1D	138782298	138784796	1361	Down
	TaPYL4-2AS	TraesCS2A02G089400	2A	42494117	42495524	1408	Up
	TaPYL5-3AS	TraesCS3A02G154400	3A	145667222	145668028	807	Down
	TaPYL6-3AL	TraesCS3A02G348400	3A	597184234	597184854	621	Up
	TaPYL6-3BL	TraesCS3B02G380300	3B	597816092	597816980	889	Up
	TaPYL7-4AS	TraesCS4A02G114400	4A	138832030	138833256	1227	Down
	TaPYL9-7AL	TraesCS7A02G358200	7A	527995110	527996032	923	Up
	TaPYL9-7DL	TraesCS7D02G364600	7D	470837323	470838275	953	Up
TaPP2Cs	TaPP2C1	TraesCS1A02G033700	1A	16425345	16428037	2189	Up
	TaPP2C3	TraesCS1A02G202300	1A	363451669	363455323	1596	Up
	TaPP2C8	TraesCS1A02G358600	1A	540336968	540339603	1306	Up
	TaPP2C10	TraesCS1A02G411200	1A	571986755	571989201	1357	Up
	TaPP2C15	TraesCS1B02G216500	1B	392433856	392437816	1721	Up
	TaPP2C18	TraesCS1B02G242300	1B	429898529	429902466	2355	Up
	TaPP2C19	TraesCS1B02G242400	1B	429976011	429979574	2159	Up
	TaPP2C20	TraesCS1B02G375100	1B	605933187	605936260	1466	Up
	TaPP2C22	TraesCS1B02G441400	1B	662520537	662522241	1406	Up
	TaPP2C28	TraesCS1D02G205700	1D	291491344	291495055	1694	Up
	TaPP2C32	TraesCS1D02G229700	1D	318098795	318104241	2685	Up
	TaPP2C33	TraesCS1D02G419000	1D	476207922	476210244	1398	Up
	TaPP2C39	TraesCS2A02G087100	2A	40554695	40556331	1637	Up
	TaPP2C40	TraesCS2A02G201900	2A	176076146	176080876	2363	Up
	TaPP2C44	TraesCS2A02G290500	2A	500531542	500535421	2257	Up
	TaPP2C45	TraesCS2A02G317200	2A	542658154	542663623	2304	Up
	TaPP2C48	TraesCS2A02G428500	2A	681244420	681248070	1800	Up
	TaPP2C49	TraesCS2A02G456300	2A	705068193	705070737	1474	Down
	TaPP2C50	TraesCS2A02G500200	2A	729283043	729287271	1350	Up
	TaPP2C52	TraesCS2B02G101800	2B	62983936	62985123	1158	Up
	TaPP2C54	TraesCS2B02G166100	2B	138963889	138968221	2094	Up
	TaPP2C56	TraesCS2B02G248200	2B	254643884	254645396	1297	Up
	TaPP2C58	TraesCS2B02G291800	2B	405646465	405655192	1590	Up
	TaPP2C59	TraesCS2B02G307000	2B	439225048	439228899	2301	Up
	TaPP2C60	TraesCS2B02G335200	2B	478892333	478897212	2309	Up
	TaPP2C63	TraesCS2B02G449200	2B	641939920	641943526	1793	Up
	TaPP2C64	TraesCS2B02G478400	2B	675514196	675516755	1642	Down
	TaPP2C65	TraesCS2B02G528100	2B	722616850	722620885	1369	Up
	TaPP2C66	TraesCS2D02G000300	2D	58039	62377	1978	Up
	TaPP2C67	TraesCS2D02G084400	2D	36576473	36578292	1820	Up
	TaPP2C70	TraesCS2D02G144500	2D	85921185	85925847	2285	Up
	TaPP2C73	TraesCS2D02G214200	2D	175591674	175595822	1684	Up
	TaPP2C75	TraesCS2D02G288400	2D	369480795	369485046	2304	Up
	TaPP2C76	TraesCS2D02G315100	2D	404398871	404403712	1596	Up
	TaPP2C79	TraesCS2D02G426600	2D	538796200	538800061	2027	Up
	TaPP2C80	TraesCS2D02G456600	2D	564383678	564386340	1487	Down
	TaPP2C81	TraesCS2D02G500400	2D	595145351	595149710	1490	Up
	TaPP2C84	TraesCS3A02G195600	3A	288535826	288542949	1912	Up
	TaPP2C87	TraesCS3A02G209200	3A	371624884	371629938	3941	Up	1
	TaPP2C88	TraesCS3A02G222800	3A	416306322	416312777	1393	Down
	TaPP2C89	TraesCS3A02G237800	3A	444534322	444538650	1508	Up
	TaPP2C90	TraesCS3A02G249000	3A	467153054	467156209	1720	Up	2
	TaPP2C91	TraesCS3A02G362200	3A	610366785	610369055	2005	Up
	TaPP2C97	TraesCS3B02G226900	3B	319823761	319833789	2164	Up
	TaPP2C99	TraesCS3B02G240000	3B	378686986	378691826	2066	Up	1
	TaPP2C101	TraesCS3B02G266200	3B	426994779	427001637	1457	Up
	TaPP2C102	TraesCS3B02G277900	3B	447981062	447984222	1863	Up	2
	TaPP2C104	TraesCS3B02G394600	3B	621936183	621938358	2088	Up
	TaPP2C110	TraesCS3D02G205200	3D	261735956	261744761	1764	Up
	TaPP2C112	TraesCS3D02G212100	3D	284208466	284213314	2268	Up	1
	TaPP2C114	TraesCS3D02G238000	3D	329494399	329499164	1757	Up
	TaPP2C115	TraesCS3D02G249000	3D	348158072	348161269	1754	Up	2
	TaPP2C116	TraesCS3D02G355900	3D	467748833	467750781	1582	Up
	TaPP2C120	TraesCS4A02G050000	4A	40859986	40861748	1673	Up
	TaPP2C121	TraesCS4A02G094300	4A	102445872	102447774	1662	Up
	TaPP2C122	TraesCS4A02G110100	4A	134208144	134210191	1596	Up
	TaPP2C127	TraesCS4A02G363400	4A	636655764	636658774	1661	Up
	TaPP2C131	TraesCS4B02G162100	4B	324420802	324427019	2127	Down
	TaPP2C133	TraesCS4B02G186800	4B	406803496	406811545	1735	Up
	TaPP2C134	TraesCS4B02G194000	4B	417137370	417139560	1557	Up
	TaPP2C135	TraesCS4B02G210100	4B	448801678	448803545	1634	Up
	TaPP2C136	TraesCS4B02G254700	4B	519823034	519824884	1726	Up
	TaPP2C142	TraesCS4D02G159700	4D	230904252	230910735	2109	Down
	TaPP2C146	TraesCS4D02G194900	4D	337934606	337936665	1611	Up
	TaPP2C147	TraesCS4D02G210900	4D	363246628	363248494	1624	Up
	TaPP2C148	TraesCS4D02G254500	4D	423428684	423429930	1170	Up
	TaPP2C153	TraesCS5A02G076600	5A	92201541	92204511	1793	Up
	TaPP2C156	TraesCS5A02G183600	5A	383418336	383419385	1050	Up
	TaPP2C158	TraesCS5A02G398900	5A	592636653	592638925	1143	Up
	TaPP2C162	TraesCS5A02G479600	5A	652998740	653002401	2339	Up
	TaPP2C165	TraesCS5B02G078500	5B	94385570	94389035	1774	Up
	TaPP2C166	TraesCS5B02G082500	5B	103333815	103336741	1690	Up
	TaPP2C169	TraesCS5B02G182000	5B	331373823	331375262	1440	Up
	TaPP2C170	TraesCS5B02G238200	5B	418918566	418923035	1498	Up
	TaPP2C172	TraesCS5B02G404000	5B	580364143	580366866	1623	Up
	TaPP2C174	TraesCS5B02G491600	5B	659813764	659821696	4428	Up
	TaPP2C175	TraesCS5B02G492700	5B	660667058	660670524	2265	Up
	TaPP2C176	TraesCS5B02G510000	5B	675879845	675883000	1769	Up
	TaPP2C178	TraesCS5D02G089900	5D	97056176	97059522	1909	Up
	TaPP2C181	TraesCS5D02G188600	5D	291084497	291086497	1787	Up
	TaPP2C182	TraesCS5D02G246700	5D	354529976	354534659	1633	Up
	TaPP2C184	TraesCS5D02G408500	5D	473000929	473003632	1645	Up
	TaPP2C186	TraesCS5D02G493200	5D	525982565	525986106	2281	Up
	TaPP2C187	TraesCS5D02G510100	5D	535127456	535130518	1673	Up
	TaPP2C195	TraesCS6A02G199000	6A	311855991	311861932	2167	Up
	TaPP2C199	TraesCS6A02G363900	6A	592684365	592688476	1813	Up
	TaPP2C202	TraesCS6B02G148200	6B	149415305	149418405	1456	Up
	TaPP2C204	TraesCS6B02G216900	6B	298308553	298311448	1533	Down
	TaPP2C205	TraesCS6B02G220000	6B	310352963	310358639	1806	Up
	TaPP2C211	TraesCS6B02G398500	6B	674100424	674104594	1827	Up
	TaPP2C214	TraesCS6D02G137200	6D	105819999	105825261	1943	Down
	TaPP2C218	TraesCS6D02G184300	6D	232119029	232125412	2268	Up
	TaPP2C225	TraesCS7A02G143200	7A	94401050	94404595	1725	Up
	TaPP2C227	TraesCS7A02G350600	7A	513537419	513542505	1415	Down
	TaPP2C231	TraesCS7A02G423900	7A	616747780	616750237	963	Up
	TaPP2C232	TraesCS7A02G504800	7A	692877021	692880865	1197	Up
	TaPP2C235	TraesCS7B02G045100	7B	44294352	44298713	1700	Up
	TaPP2C243	TraesCS7B02G411900	7B	680112239	680117720	2038	Up
	TaPP2C253	TraesCS7D02G417600	7D	536470490	536473061	1201	Up
	TaPP2C254	TraesCS7D02G492000	7D	600883016	600887534	1525	Up
TaSnRKs	TaSnRK2.2	TraesCS2A02G163800	2A	116013921	116019018	1884	Up
	TaSnRK2.5	TraesCS2D02G577000	2D	640297481	640299386	1522	Down
	TaSnRK2.1	TraesCS2A02G303900	2A	522072400	522077216	1415	Up
